# Supplementary material for: Individual radiation exposure from computed tomography: a survey of paediatric practice in French university hospitals, 2010–2013
Source: Springer Nature journal article supplement (doi:10.1007/s00330-017-5001-y), 2017-08-23
Supplement: MOESM1 [file 14235498]

## Sheet: Sheet1
Electronic Supplementary Material
Distribution of scanning parameters (kvp, mAs, pitch, total collimation and scan length) by age group, for commonly and less frequently scanned body parts
Scanned body part		Patient age (years)	N	Tube voltage (kVp, in %)				Tube current.time (mAs)					Pitch					Total beam collimation (mm)					Scan length (mm)
				80-90	100-110	120	130-140	P5	P50	P75	P95	P95/P5	P5	P50	P75	P95	P95/P5	P5	P50	P75	P95	P95/P5	P5	P50	P75	P95	P95/P5
(A) By age group for common examinations		Age group
HEAD	Skull & facial bones (routine)	<1	202	6.43564	14.8515	78.7129	0	62	141	141	168	2.70968	0.474	0.563	0.563	0.673	1.41983	10	12	20	40	4	101	127	138	158	1.56436
		1-4	287	1.39373	28.223	70.3833	0	45	119	143	158	3.51111	0.474	0.563	0.563	0.938	1.9789	12	20	20	25	2.08333	100	146.5	158.5	200	2
		5-9	429	0.699301	10.0233	89.2774	0	63	111	158	158	2.50794	0.474	0.531	0.563	0.563	1.18776	12	20	20	25	2.08333	113.8	152.5	170	235	2.06503
		10-14	244	0	5.32787	94.2623	0.409836	66	119	158	203	3.07576	0.474	0.531	0.563	0.675	1.42405	12	20	25	25	2.08333	130	166.55	184.2	246.9	1.89923
	Petrous bones	<1	35	0	0	100	0	53	69	70	105	1.98113	0.313	0.354	0.354	0.531	1.69649	1.2	12	13	25	20.8333	17.3	35	47.9	91.4	5.28324
		1-4	116	0	7.75862	32.7586	59.4828	69	70	100	228	3.30435	0.313	0.354	0.474	0.531	1.69649	1.2	13	20	20	16.6667	29.7	42.65	52.85	97.5	3.28283
		5-9	178	0	3.37079	14.0449	82.5843	69	69	144	365	5.28986	0.313	0.313	0.531	0.531	1.69649	1.2	1.2	20	20	16.6667	30	40.05	47.3	69.6	2.32
		10-14	76	0	1.31579	11.8421	86.8421	69	69	197.5	350	5.07246	0.313	0.313	0.531	0.531	1.69649	1.2	1.2	20	20	16.6667	31.8	41.2	46.9	67	2.10692
	Paranasal sinuses	<1	32	0	12.5	87.5	0	16	51.5	56	56	3.5	0.474	0.938	0.938	0.938	1.9789	12	12	20	25	2.08333	30	79.55	102.9	156.1	5.20333
		1-4	43	0	4.65116	88.3721	6.97674	20	45	47	56	2.8	0.474	0.563	0.624	0.938	1.9789	12	20	25	25	2.08333	69.3	101.9	146.8	172.5	2.48918
		5-9	113	0	18.5841	76.1062	5.30973	20	45	56	56	2.8	0.531	0.624	0.938	0.938	1.76648	12	12	20	25	2.08333	74.2	106.3	122	158.8	2.14016
		10-14	85	0	30.5882	65.8824	3.52941	20	35	50	98	4.9	0.531	0.624	0.624	0.938	1.76648	12	25	25	25	2.08333	88.8	110.7	126.7	172.8	1.94595
	Brain	<1	193	96.3731	0	3.62694	0	125	125	125	125	1	0.626	0.626	0.626	0.626	1	25	25	25	25	1	123	140	147	158	1.28455
		1-4	30	66.6667	3.33333	30	0	107	125	125	125	1.16822	0.474	0.626	0.626	0.626	1.32068	25	25	25	25	1	117	146	152	194.5	1.66239
		5-9	<30	_	_	_	_	_	_		_	_	_	_	_	_	_	_	_	_	_	_	_	_	_	_	_
		10-17	<30	_	_	_	_	_	_		_	_	_	_	_	_	_	_	_	_	_	_	_	_	_	_	_
CHEST	Chest (routine)	<1	85	85.8824	4.70588	9.41176	0	32	74	74	99	3.09375	0.674	0.924	0.938	1.188	1.76261	24	25	25	40	1.66667	95.5	133	155.5	197.5	2.06806
		1-4	229	43.2314	4.80349	51.9651	0	22	37	74	87	3.95455	0.674	0.924	0.924	0.984	1.45994	24	25	25	40	1.66667	136	173.5	195	229	1.68382
		5-9	171	8.77193	15.2047	76.0234	0	22	33	45	91	4.13636	0.674	0.924	1.375	1.375	2.04006	20	25	40	40	2	174.5	219	241.2	265.5	1.52149
		10-14	178	2.24719	19.1011	78.0899	0.561798	31	48	75	132	4.25806	0.674	0.938	1.375	1.375	2.04006	24	25	40	40	1.66667	194	260.05	288.9	340	1.75258
	Chest (high resolution)	<1	29	100	0	0	0	47	47	47	75	1.59574	0.938	0.938	0.938	0.938	1	12	12	12	12	1	67.8	109.2	123	143.4	2.11504
		1-4	57	98.2456	1.75439	0	0	40	63	65	70	1.75	0.938	0.938	0.938	0.938	1	12	12	12	20	1.66667	111.6	159.6	180.6	205	1.83692
		5-9	81	82.716	3.7037	13.5802	0	56	64	65	68	1.21429	0.938	0.938	0.938	1.375	1.46588	12	12	12	40	3.33333	157.8	195.6	206.4	244.2	1.54753
		10-14	34	35.2941	2.94118	61.7647	0	62	65.5	67	69	1.1129	0.938	0.938	0.938	0.938	1	12	12	12	12	1	109.8	209.4	244.8	295.8	2.69399
	Mediastinum with contrast	<1	83	93.9759	4.81928	1.20482	0	45	66	89	134	2.97778	0.89	0.89	0.938	0.984	1.10562	24	40	40	40	1.66667	79.2	125.6	146	225.6	2.84848
		1-4	104	70.1923	4.80769	25	0	31	71.5	80	134	4.32258	0.89	0.924	0.938	1.188	1.33483	12	40	40	40	3.33333	121.9	167.8	192.3	282.5	2.31747
		5-9	86	22.093	38.3721	39.5349	0	31	67	77	147	4.74194	0.726	0.938	1.375	1.375	1.89394	12	40	40	40	3.33333	126.4	218	241.5	335.6	2.65506
		10-14	55	12.7273	16.3636	70.9091	0	20	76	150	210	10.5	0.609	0.938	1	1.375	2.2578	12	40	40	40	3.33333	155.2	261	306	610.2	3.9317
ABDOMEN AND PELVIS	Abdomen only	<1	29	79.3103	0	20.6897	0	32	63	94	118	3.6875	0.906	0.938	0.938	0.938	1.03532	12	12	25	40	3.33333	48	182	200	255.3	5.31875
		1-4	102	53.9216	1.96078	44.1176	0	28	81.5	94	127	4.53571	0.906	0.924	0.938	0.938	1.03532	12	25	40	40	3.33333	114	252	286	350	3.07018
		5-9	102	25.4902	7.84314	66.6667	0	31	65	103	139	4.48387	0.906	0.938	0.938	1.375	1.51766	12	24	40	40	3.33333	130	306	342	392	3.01538
		10-14	106	0.943396	0	98.1132	0.943396	52	76	96	152	2.92308	0.906	0.906	0.924	0.938	1.03532	24	40	40	40	1.66667	220	386.5	419	504	2.29091
	Abdomen-pelvis	<1	<30	_	_	_	_	_	_		_	_	_	_	_	_	_	_	_	_	_	_	_	_	_	_	_
		1-4	30	6.66667	3.33333	90	0	30	46	92	175	5.83333	0.781	0.924	0.924	0.924	1.1831	25	25	40	40	1.6	204	288	320	434	2.12745
		5-9	52	1.92308	21.1538	76.9231	0	39	70	125	175	4.48718	0.906	1.082	1.375	1.375	1.51766	25	40	40	40	1.6	148.5	340	371.4	452.5	3.04714
		10-14	70	1.42857	2.85714	94.2857	1.42857	46	98	124	170	3.69565	0.469	0.924	1.375	1.375	2.93177	25	36.25	40	40	1.6	243	401	438.7	458	1.88477
(B) For all ages combined for infrequent examinations		Median age (P5-P95)									_	_	_	_	_	_	_	_	_	_	_	_	_	_	_	_	_
Chest-abdomen-pelvis		5 (1-14)	145	47.5862	6.89655	44.8276	0.689655	34	94	122	150	4.41176	0.672	0.938	0.938	1.375	2.04613	12	24	25	40	3.33333	not appropriate
Dental		10 (3-14)	18	0	0	100	0	32	35	47	143	4.46875	0.313	0.44	0.44	0.624	1.99361	10	12	12	25	2.5
Head and neck		9 (2-15)	23	0	13.0435	86.9565	0	80	140	183	231	2.8875	0.474	0.924	0.924	0.969	2.0443	10	25	25	25	2.5
Limbs		11 (2-15)	54	18.5185	14.8148	57.4074	9.25926	31	104	135	150	4.83871	0.31	0.626	0.688	0.938	3.02581	10	24	40	40	4
Chest (low dose)		12 (9-14)	29	6.89655	89.6552	3.44828	0	16	37	60	75	4.6875	1.375	1.375	1.375	1.375	1	20	40	40	40	2
Neck		5 (1-10)	71	1.40845	30.9859	67.6056	0	45	119	137	187	4.15556	0.474	0.563	0.969	0.984	2.07595	10	20	25	40	4
Pelvic bones		8 (0-13)	34	50	17.6471	32.3529	0	43	79	94	174	4.04651	0.426	0.938	0.984	0.984	2.30986	12	12	40	40	3.33333
Spine		8 (1-14)	80	2.5	11.25	68.75	17.5	62	143	188	235	3.79032	0.425	0.682	0.938	0.9765	2.29765	11	20	25	40	3.63636
Whole Body		9 (1-14)	74	2.7027	5.40541	91.8919	0	30	66.5	113	142	4.73333	0.531	0.672	0.672	0.984	1.85311	20	25	25	40	2
N: number of studies, P5, P25, P50, P75, P95: percentile 5, 25, 50 (median), 75, 95. NB: Statistics are given by age group only when data were collected for at least 30 studies. Scan length was determined as the difference between the maximum slice location and the minimum slice location. If not recorded as such, pitch was derived from table feed and beam collimation. Total beam collimation was d…
